# Supplementary material for: Observation of a New Polyhalide Phase in Ag-Cl2 System at High Pressure
Source: MDPI journal article supplement (doi:10.3390/cryst11121565), 2021-12-15
Supplement: s1 [file s1]

Archive with 1 entries (1 files):
- crystals-1487609-supplementary.pdf
